## Expression of hypothalamic neurohormones and their receptors in the human eye

Sander R. Dubovy<sup>1,3,\*</sup>, Maria P. Fernandez<sup>1,\*</sup>, Jose J. Echegaray<sup>1,5,\*</sup>, Norman L. Block<sup>3,4</sup>, Noriyuki Unoki<sup>1</sup>, Roberto Perez<sup>2,4</sup>, Irving Vidaurre<sup>2</sup>, Richard K. Lee<sup>1</sup>, Mehrdad Nadji<sup>3</sup> and Andrew V. Schally<sup>2,3,4</sup>

<sup>1</sup> Florida Lions Ocular Pathology Laboratory, Bascom Palmer Eye Institute, University of Miami, Miller School of Medicine, Miami, Florida, USA

<sup>2</sup> Miami Veterans Affairs Medical Center, Miami, Florida, USA

<sup>3</sup> Department of Pathology, University of Miami, Miller School of Medicine, Miami, Florida, USA

<sup>4</sup> Divisions of Hematology/Oncology, Endocrinology, Department of Medicine, University of Miami, Miller School of Medicine, Miami, Florida, USA

<sup>5</sup> Department of Ophthalmology, University of Puerto Rico School of Medicine, San Juan, PR, USA

\* These authors have contributed equally to this work

**Correspondence to:** Andrew V. Schally, **email:** andrew.schally@va.gov

**Keywords:** eye neuropeptides, ocular endocrinology, hormone-analog therapy

**Received:** May 07, 2017

**Accepted:** May 20, 2017

**Published:** June 03, 2017

Copyright: Dubovy et al. This is an open-access article distributed under the terms of the Creative Commons Attribution License 3.0 (CC BY 3.0), which permits unrestricted use, distribution, and reproduction in any medium, provided the original author and source are credited.

### ABSTRACT

**Extrahypothalamic roles for hypothalamic neurohormones have recently become apparent and clinically relevant, based on the use of synthetic peptide analogs for the treatment of multiple conditions including cancers, pulmonary edema and myocardial infarction. In the eye, it has been suggested that some of these hormones and their receptors may be present in the ciliary body, iris, trabecular meshwork and retina, but their physiological role has yet to be elucidated. Our study intends to comprehensively demonstrate the expression of some hypothalamic neuroendocrine hormones and their receptors within different retinal and extraretinal structures of the human eye. Immunofluorescence, Western blot analysis, and RT-PCR were used to evaluate the qualitative and quantitative expression of Luteinizing Hormone Releasing Hormone (LHRH), Growth Hormone Releasing Hormone (GHRH), Thyrotropin Releasing Hormone (TRH), Gastrin Releasing Peptide (GRP) and Somatostatin as well as their respective receptors (LHRH-R, GHRH-R, TRH-R, GRP-R, SST-R1) in cadaveric human eye tissue and in paraffinized human eye tissue sections. The hypothalamic hormones LHRH, GHRH, TRH, GRP and Somatostatin and their respective receptors (LHRH-R, GHRH-R, TRH-R, GRP-R, SST-R1), were expressed in the conjunctiva, cornea, trabecular meshwork, ciliary body, lens, retina, and optic nerve.**

### INTRODUCTION

It has been known since the 1930's that the anterior pituitary gland secretes several hormones which not only stimulate the thyroid, the gonads, and the adrenal cortex, but also regulate various physiologic processes. However, the mechanisms of the control of pituitary function itself were not understood. In the 1950's, G.W. Harris assembled anatomical and physiological evidence suggesting that the hypothalamic portion of the brain secreted neurohormones

that traversed the hypophyseal portal vessels to regulate secretion of pituitary hormones [1]. The work to prove Harris's neurohormonal theory extended over 30 years, and one of us (A.V.S.) played a major part in this endeavor. The discovery, isolation, structural identification, chemical synthesis, and information gathered from animal and human studies, regarding several of these hypothalamic hormones, established their regulatory function in the process of mediation of release of various anterior pituitary hormones [2-12].

Hypothalamic hormones are now known to influence growth, reproduction, lactation, metabolism, gastrointestinal function, and the response to stress, by initiating and regulating the hypothalamic-pituitary axis (HPA). This mediation involves a set of endocrine feedback mechanisms that greatly influence reproductive processes and the aforementioned metabolic activities. These regulatory effects are exerted by endocrine hormone ligands binding directly to specific receptors in appropriate target organs. Importantly, the expression of these receptors also extends to organs outside the HPA. Thus, interactions between agonistic and antagonistic hypothalamic hormone ligands and extrapituitary receptors may influence the physiology of host organs or the pathologic progression of a tumor or other lesion [13-16]. The development of synthetic analogs of hypothalamic hormones such as Luteinizing Hormone Releasing Hormone (LHRH; also called Gonadotropin Releasing Hormone, or GnRH) [17], Growth Hormone Releasing Hormone (GHRH) [18] and others has led to innovative experimental findings and to various clinical applications such as the treatment of benign prostatic hyperplasia [19] and prostate cancer [20, 21]. In addition, multiple preclinical and experimental studies have suggested that targeted cytotoxic and radiolabeled peptide conjugates, specific to hypothalamic hormone receptors, can be powerful tools for diagnosis, for primary therapy or, as adjuvants, to treat neoplastic lesions in extrapituitary organs such as breast [22-25], ovaries, endometrium [22], prostate, colon [26], liver [27] urinary bladder [28] and lung [29]. Moreover, GHRH-agonist-based therapy has recently been shown to serve cardioprotective and regenerative roles in patients with myocardial infarction [30-32].

GRP belongs to the bombesin-like peptide family, and is not a classical hypothalamic-hypophyseal regulatory hormone since it plays only a perfunctory role in the mediation of pituitary hormone release. However, GRP/bombesin-like immunoreactivity is widely distributed in mammalian brain, especially the hypothalamus, GI tract and in human fetal lung [33].

The expression of hypothalamic hormones and their receptors in the mammalian eye has been previously reported, mainly using rat models and mostly limited to retinal tissue [34-39]. Somatostatin receptors have been previously described in the human retina and other ocular structures [40-43] as has TRH, which has also been identified in human retina [44]. However, the presence of other neuropeptides and their receptors has yet to be systematically or extensively described in the multiple sub-portions of ocular anatomy.

With the onset of the transformational medical role that anti-VEGF therapy has exerted in the field of diabetic retinopathy, somatostatin analogs have been presented as a potential therapeutic alternative for these patients [45] as well as for patients with age-related

macular degeneration [46]. Further, antagonistic effects of GHRH and cAMP response element-binding-protein analogs have been suggested to mediate reduction of ocular inflammation in animal models [47]. TRH has been indirectly associated with intraocular pressure elevation [48]. To our knowledge, mechanisms for the role of these neuropeptides in ocular physiology and pathology in the human eye remain to be defined. These investigations, of course, would be abetted and would need to be preceded by such a systematic verification of the presence of these neuropeptides and their receptors.

In this study, we used immunofluorescence staining, Western blot analysis, and RT-PCR to comprehensively identify the expression of the following hypothalamic neuropeptide ligands: LHRH, GHRH, TRH, somatostatin, and GRP as well as the presence of their respective receptors (LHRH-R, GHRH-R, TRH-R, SST-R1 and GRP-R) in the various human eye structures. The structures we included are the conjunctival epithelium, corneal epithelium, corneal endothelium, trabecular meshwork, ciliary body muscle, ciliary body non-pigmented epithelium, lens epithelium, retinal nerve fiber layer, neural retina and optic nerve. The presence of these hormones and their receptors in these structures suggests their potential role in human ocular physiology and in the pathogenesis of ocular disease and may also provide molecular-based targets for the treatment of neoplastic and non-neoplastic ophthalmic diseases.

## RESULTS

### Luteinizing hormone releasing hormone and its receptor

LHRH (Figure 1) and LHRH-R (Figure 2) were identified by Immunofluorescence in paraffin-embedded human eyes using anti-LHRH and anti-LHRH-R antibodies.

LHRH was found to be expressed in the corneal epithelium (Figure 1A), conjunctival epithelium (Figure 1C), ciliary body non-pigmented epithelium (Figure 1D), ciliary body muscle (Figure 1E) trabecular meshwork (Figure 1F), optic nerve (Figure 1G), neural retina (Figure 1H) and lens epithelium (Figure 1I). No expression of LHRH was observed in the corneal endothelium (Figure 1B). Expression in the corneal epithelium, conjunctival epithelium and lens epithelium was weaker than the expression in the other aforementioned structures. LHRH was found to be diffusely expressed throughout all layers of the neural retina and RPE.

LHRH-R was found to be expressed in the ciliary body non-pigmented epithelium (Figure 2D), ciliary body muscle (Figure 2E), trabecular meshwork (Figure 2F), optic nerve (Figure 2G) and neural retina (Figure 2H).

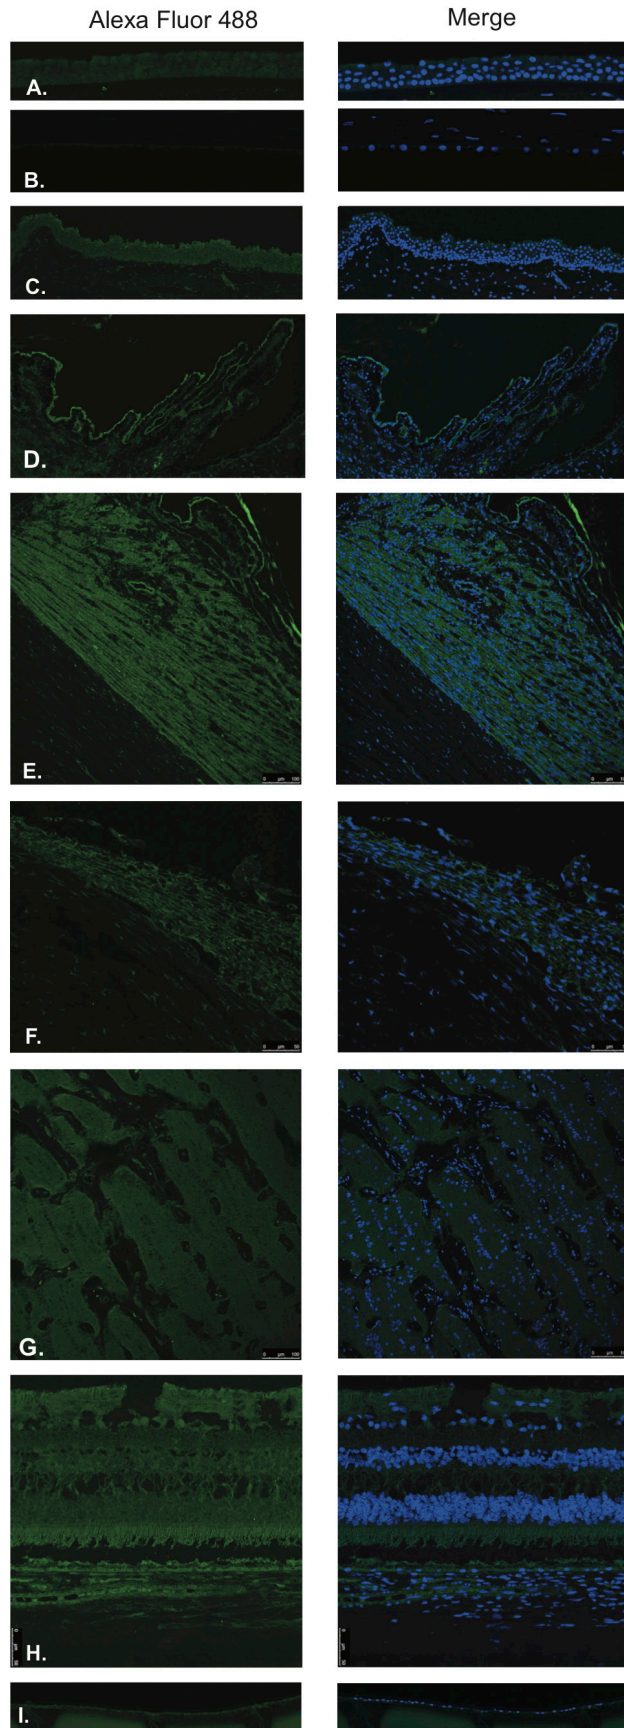

Figure 1: Luteinizing hormone releasing hormone (LHRH).

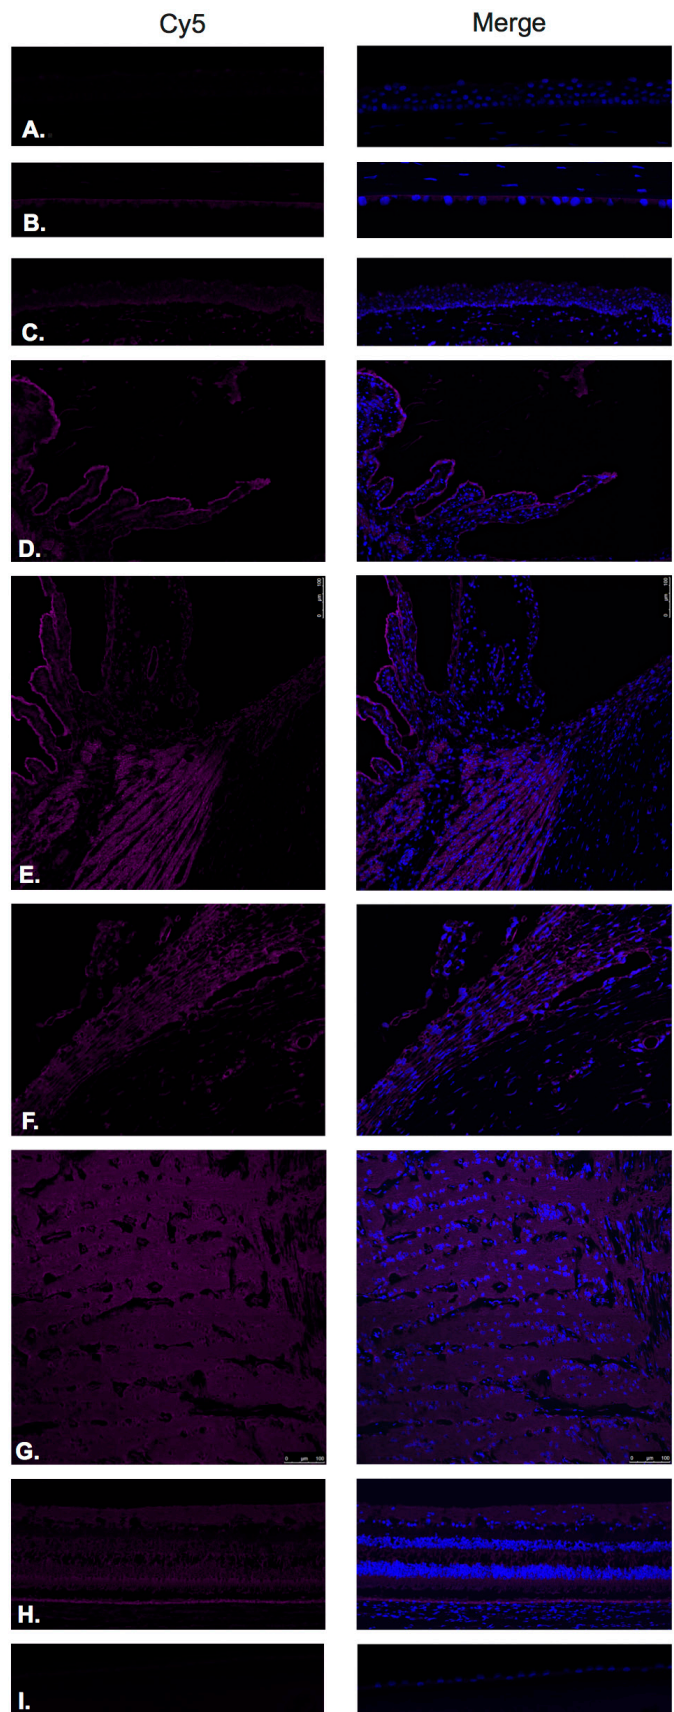

Figure 2: Luteinizing hormone releasing hormone receptor (LHRH-R).



Very weak signal was found to be present in the corneal endothelium (Figure 2B) conjunctival epithelium (Figure 2C) and neural retina (Nerve fiber layer (NFL), inner nuclear layer, outer plexiform layer, outer nuclear layer and photoreceptors). Stronger signal was identified at the level of the RPE (Figure 2H). No expression of LHRH-R was observed in the corneal epithelium (Figure 2A) or lens epithelium (Figure 2I).

LHRH-R expression was also detected by Western blot in unfixed cadaveric human eye tissues (Figure 11). Cadaveric conjunctival, corneal epithelium, retinal, and optic nerve tissue samples were dissected and equal amounts of protein were loaded for each sample. We detected major bands at 42 kD corresponding to LHRH receptor, for all conjunctiva, corneal epithelium, neural retina, and optic nerve tissues. Actin was used for internal control for all samples tested.

### **Growth hormone releasing hormone and its receptors**

GHRH (Figure 3) and GHRH-R (Figure 4) were identified by Immunofluorescence in paraffin-embedded human eyes using anti-GHRH and anti-GHRH-R antibodies.

GHRH was found to be expressed in the corneal epithelium (Figure 3A), corneal endothelium (Figure 3B) conjunctival epithelium (Figure 3C), ciliary body non-pigmented epithelium (Figure 3D), ciliary body muscle (Figure 3E) trabecular meshwork (Figure 3F), optic nerve (Figure 3G), neural retina (Figure 3H) and lens epithelium (Figure 3I). GHRH was found to be diffusely expressed throughout all layers of the neural retina with no expression being observed at the level of the RPE (Figure 3H).

GHRH-R was found to be expressed in the corneal epithelium (Figure 4A), corneal endothelium (Figure 4B), conjunctival epithelium (Figure 4C), ciliary body non-pigmented epithelium (Figure 4D), ciliary body muscle (Figure 4E), optic nerve (Figure 4G) and neural retina (Figure 4H). Weak signal was found to be present in the corneal endothelium (Figure 4B) ciliary body muscle (Figure 4F), optic nerve (Figure 4G), outer plexiform layer, outer nuclear layer and photoreceptors in the neural retina. Stronger signal was identified at the level of the NFL, outer aspect of the inner nuclear layer and RPE. (Figure 4H). No expression of GHRH-R was observed in the trabecular meshwork (Figure 4E) or lens epithelium. (Figure 4I).

Western blot analysis using anti-GHRH-R antibody demonstrated major bands at molecular weight (39.1 kD) corresponding to GHRH-R splice variant-1 (SV-1) in corneal epithelium, neural retina, and optic nerve (Figure 11). There was a 50 kD band present in all tissues (conjunctiva, corneal epithelium, neural retina and optic

nerve) corresponding to unglycosylated GHRH-R. Additionally, we detected expression for GHRH-R proteins at higher molecular weights (63.7 kD) corresponding to Pituitary Type GHRH receptor (pGHRH-R) in all four tested samples: conjunctiva, corneal epithelium, neural retina, and optic nerve. These major bands correspond to the glycosylated form of the receptor. Actin was used for internal control for all samples tested.

### **Thyrotropin releasing hormone and its receptor**

TRH (Figure 5) and TRH-R (Figure 6) were identified by Immunofluorescence in paraffin-embedded human eyes using anti-TRH and anti-TRH-R antibodies.

TRH was detected in the corneal epithelium (Figure 5A), corneal endothelium (Figure 5B), conjunctival epithelium (Figure 5C), ciliary body non-pigmented epithelium (Figure 5D), ciliary body muscle (Figure 5E), trabecular meshwork (Figure 5F), optic nerve (Figure 5G), neural retina (Figure 5H) and lens epithelium (Figure 5I). In the neural retina, TRH was found to be expressed in the NFL, inner and outer nuclear layers, inner and outer plexiform layers with stronger immunoreaction in the inner and outer segments of photoreceptors (Figure 5H).

TRH-R was found to be expressed in the ciliary body non-pigmented epithelium (Figure 6D), ciliary body muscle (Figure 6E), optic nerve (Figure 6G) and neural retina (Figure 6H). No expression was observed in the corneal epithelium (Figure 6A), corneal endothelium (Figure 6B), conjunctival epithelium (Figure 6C) or lens epithelium (Figure 6I). Weak signal was detected in the trabecular meshwork (Figure 6F). In the neural retina, TRH-R was strongly expressed in the outer nuclear layer and inner segments of photoreceptors (Figure 6H).

Western blot was performed on these tissues but no clear signals were obtained for TRH-R (Results not shown).

### **Somatostatin and its receptor (SST-R1)**

Somatostatin hormone (Figure 7) and its predominant receptor in the CNS, SST-R1 (Figure 8) were identified by Immunofluorescence in paraffin-embedded human eyes using anti-Somatostatin and anti-Somatostatin Receptor 1 antibodies.

Somatostatin was detected in corneal epithelium (Figure 7A), corneal endothelium (Figure 7B), conjunctival epithelium (Figure 7C), ciliary body non-pigmented epithelium (Figure 7D), ciliary body muscle (Figure 7E), trabecular meshwork (Figure 7F), optic nerve (Figure 7G), neural retina (Figure 7H) and lens epithelium (Figure 7I). In the retina, somatostatin was found to be expressed in the NFL, ganglion cell layer, inner and outer nuclear layers, inner and outer plexiform layers and RPE

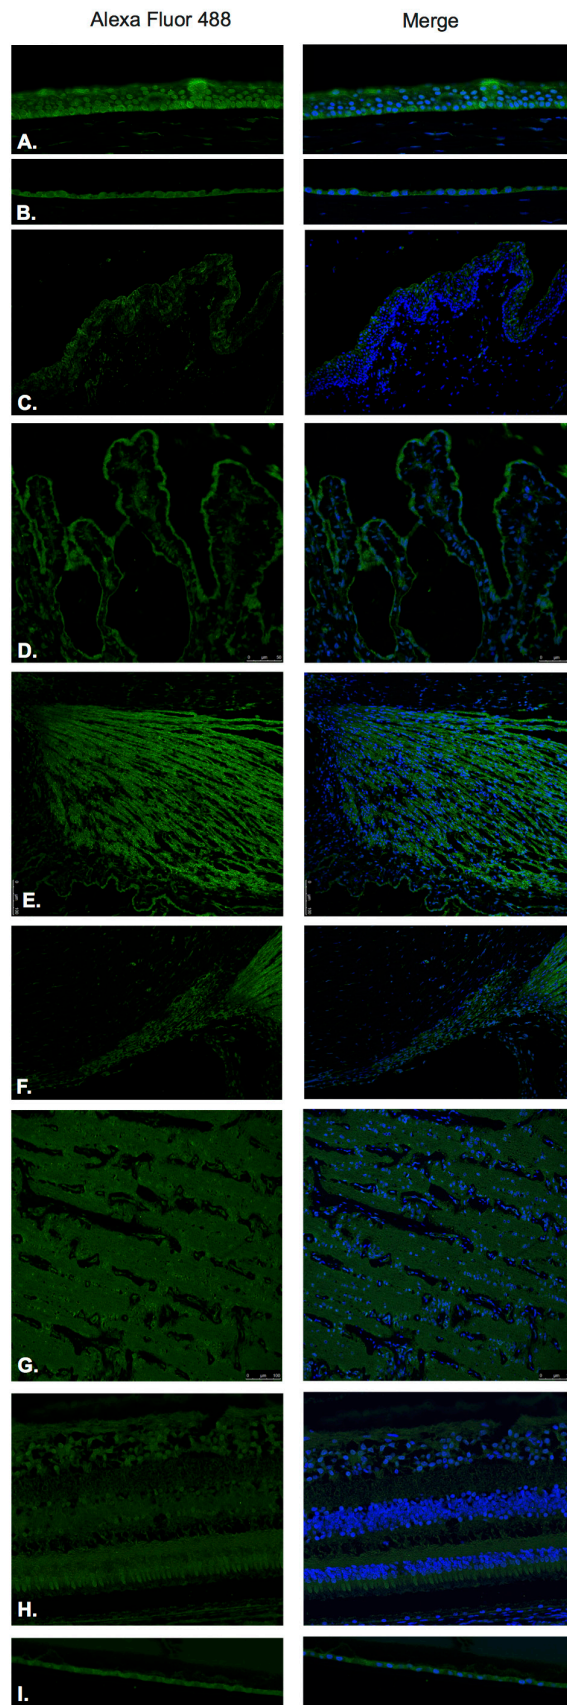

Figure 3: Growth hormone releasing hormone (GHRH).

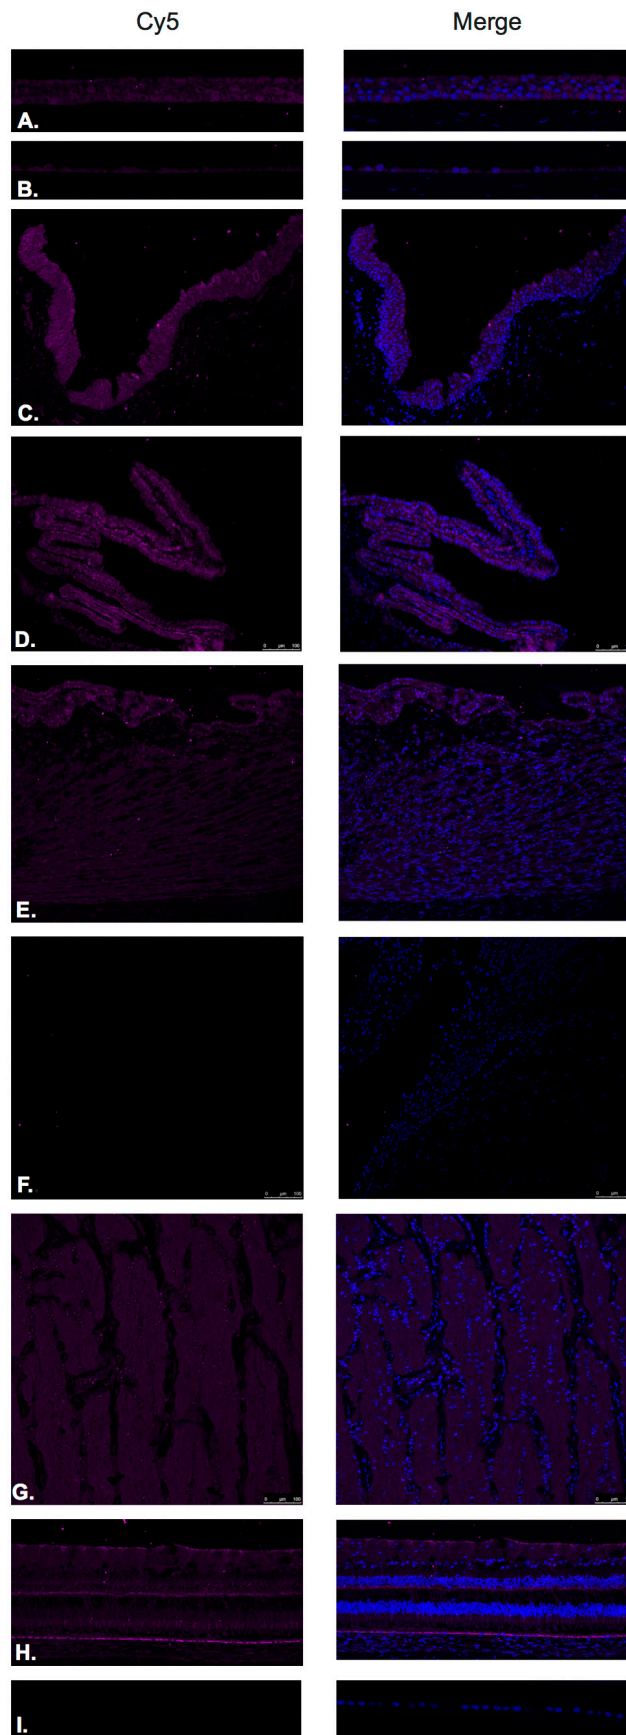

**Figure 4: Growth hormone releasing hormone receptor (GHRH- R).**



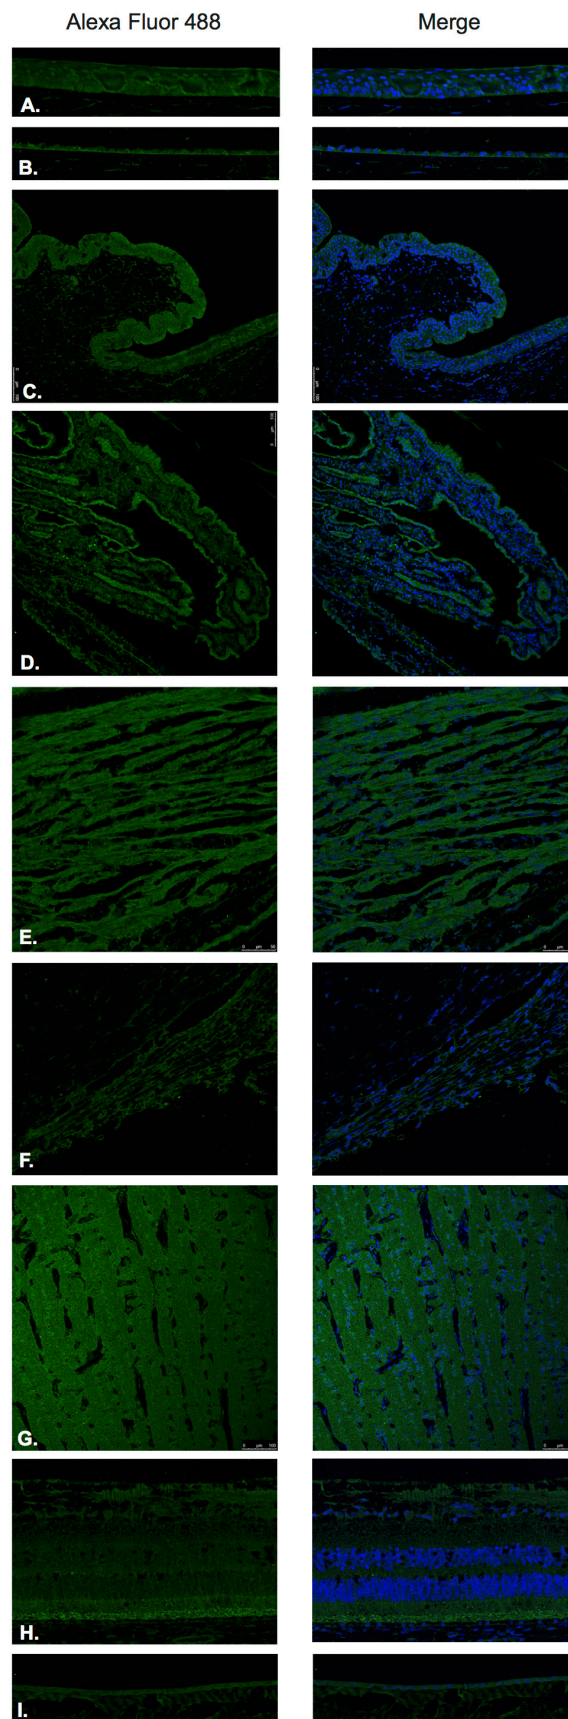

Figure 5: Thyrotropin releasing hormone (TRH).



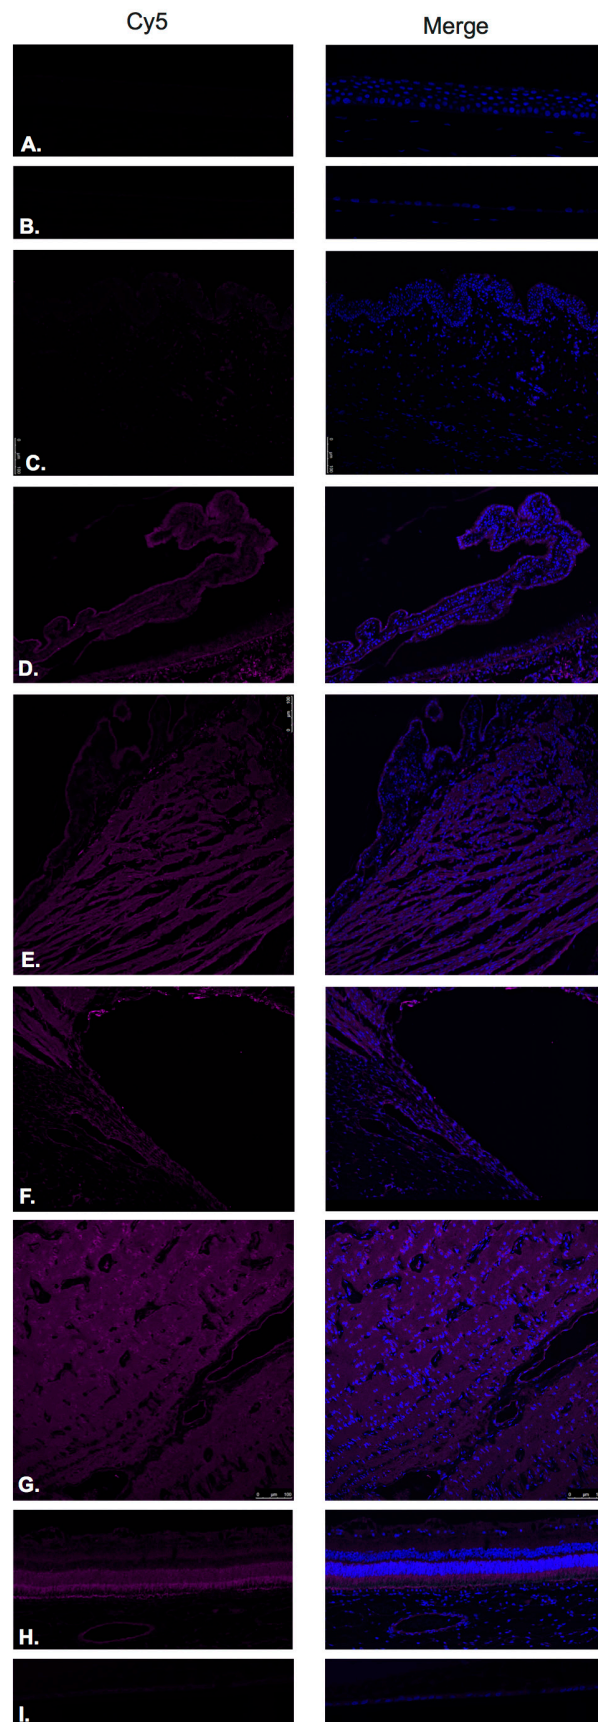

Figure 6: Thyrotropin releasing hormone receptor (TRH-R).

(Figure 7H).

SST-R1 was expressed within the corneal epithelium (Figure 8A), corneal endothelium (Figure 8B), conjunctival epithelium (Figure 8C), ciliary body non-pigmented epithelium (Figure 8D), ciliary body muscle (Figure 8E), trabecular meshwork (Figure 8F), optic nerve (Figure 8G) and neural retina (Figure 8H). No expression was observed in the lens epithelium (Figure 8I). In the neural retina, SST-R1 was strongly expressed in the NFL, inner nuclear layer and inner segments of photoreceptors (Figure 8H).

SST-R1 expression was also detected by Western blot in cadaveric human eye tissues (Figure 11). Cadaveric conjunctival, corneal epithelium, retinal, and optic nerve tissue samples were dissected and equal amounts of protein were loaded for each sample. Major bands were demonstrated at 48 kD corresponding to SST-R1 for all conjunctiva, corneal epithelium, retina, and optic nerve tissues. Actin was used for internal control for all samples tested.

### Gastrin releasing peptide and its receptor

GRP (Figure 9) and GRP-R/BB2, receptor for GRP/mammalian bombesin, (Figure 10) were identified by Immunofluorescence in paraffin-embedded human eyes using anti-GRP and anti-GRP Receptor antibodies.

GRP was detected in ciliary body non-pigmented epithelium (Figure 9D), retina (Figure 9H) and lens epithelium (Figure 9I). Weak signal was detected in the ciliary body muscle (Figure 9E) and trabecular meshwork (Figure 9F). In the neural retina, GRP was found to be strongly and diffusely expressed in the NFL, ganglion cell layer, inner and outer nuclear layers, inner and outer plexiform layers, inner photoreceptor segments and at the level of the RPE (Figure 9H). No expression was observed in the corneal epithelium (Figure 9A), corneal endothelium (Figure 9B), conjunctival epithelium (Figure 9C) or optic nerve (Figure 9G).

Expression of GRP-R was detected in the corneal epithelium (Figure 10A) mostly at the level of basal epithelial layer. GRP-R was also identified in a few cells within the optic nerve substance (Figure 10G) and at the level of the ganglion cell layer in the retina (Figure 10H). No expression was observed in the corneal endothelium (Figure 10B), conjunctival epithelium (Figure 10C), ciliary body non-pigmented epithelium (Figure 10D), ciliary body muscle (Figure 10E), trabecular meshwork (Figure 10F) or lens epithelium (Figure 10I).

The presence of GRP-R protein was further detected in ocular tissue using Western blot analysis (Figure 6). All tissues that were sampled (conjunctiva, corneal epithelium, retina, and optic nerve) showed GRP-R expression with major bands detected at 43 kD corresponding to the GRP receptor. Actin was used for internal control for all

samples tested.

### Expression of hypothalamic neurohormones and receptor mRNAs in human retina tissue

Pairs of retinal tissue (right and left) were collected from five pairs of unfixed cadaveric eyes. Samples ( $N = 10$ ) were individually homogenized and mRNA isolated from each. We analyzed each sample, in triplicate, using one-step RT-qPCR with SYBR green chemistry. The expression of each target gene was normalized to the geometric mean of the expression of act $\beta$ ,  $\beta$ -2M, and GAPDH from the corresponding sample ( $\delta\delta$ Ct method). All retina samples were found to express growth hormone-releasing hormone (GHRH), its receptor (GHRH-R), and a functional splice variant of GHRH-R (SV-1) (Supplementary Table 1). All samples were also found to express gastrin-releasing peptide (GRP) and its receptor (GRP-R); luteinizing hormone-releasing hormone (LHRH) and its receptor (LHRH-R); somatostatin (SST) and SST receptors 1 and 2 (SST-R1 and SST-R2); and thyrotropin-releasing hormone (TRH) and its receptor (TRH-R) (Supplementary Table 1). Sequences for the target mRNA were obtained using the provided accession number in the NCBI database (Supplementary Table 2).

### DISCUSSION

The present study systematically demonstrates the expression of LHRH, GHRH, TRH, somatostatin and GRP and their receptors in retinal and extraretinal structures of the human eye, using different techniques, including RT-PCR, Western blot and Immunofluorescence. In addition, we have shown that the expression of these neuroendocrine hormones and their receptors varies throughout different anatomic locations within the eye.

This data may have significant clinical implications by contributing to the better understanding of neuroendocrine influences within the eye. Establishing the presence of hypothalamic hormones and their receptors for each ocular structure also provides a distribution map for these peptides and thereby provides a key for the better understanding of physiologic, pathophysiologic and clinical implications such as the ones that have already been described in the literature [39, 40].

Several studies have demonstrated the wide clinical and therapeutic role that these neuropeptides and their receptors may play in various human diseases including cancer, myocardial infarction and pulmonary edema. Analogs of these peptides and their receptors have been used to manipulate the growth of certain tumors such as breast and prostate cancers. New treatment alternatives for patients with cancer may be based on the ability of these analogs to alter the course and progression of the involved tumors.

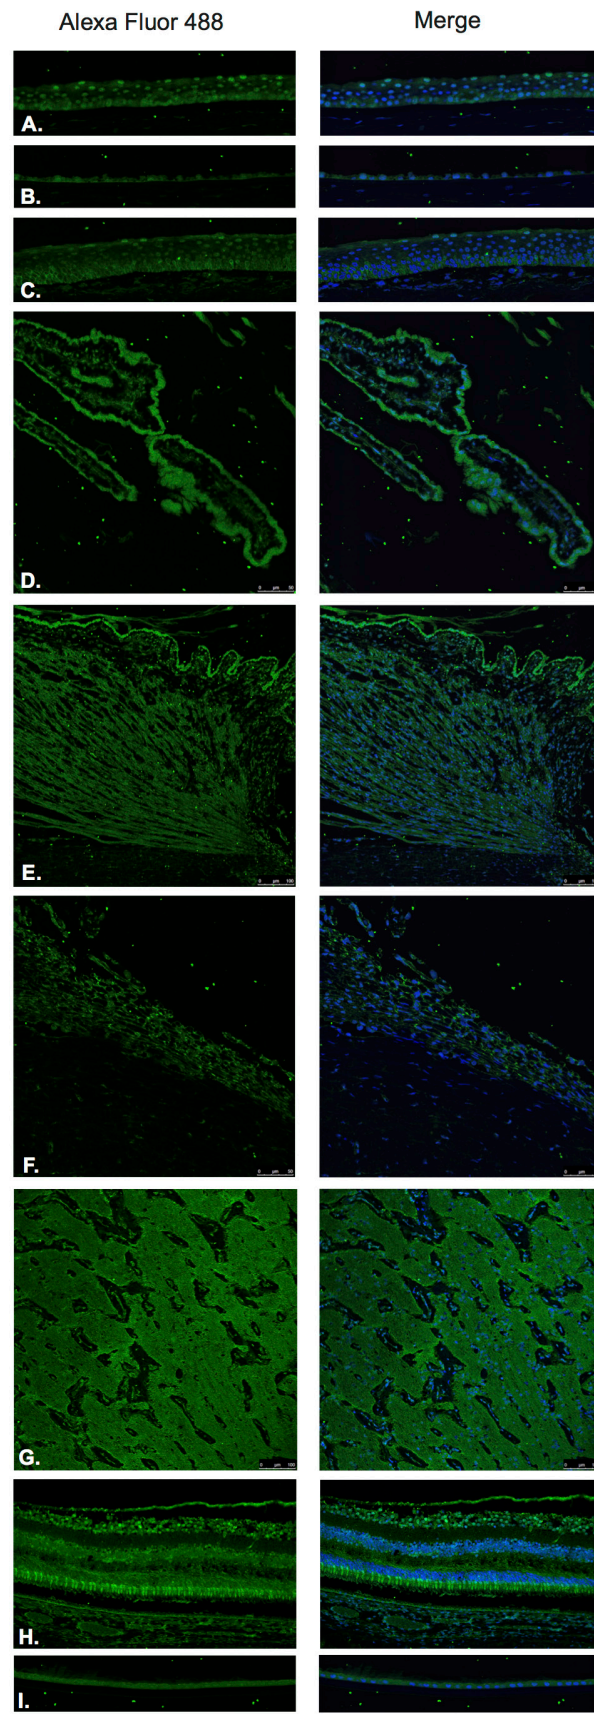

Figure 7: Somatostatin.



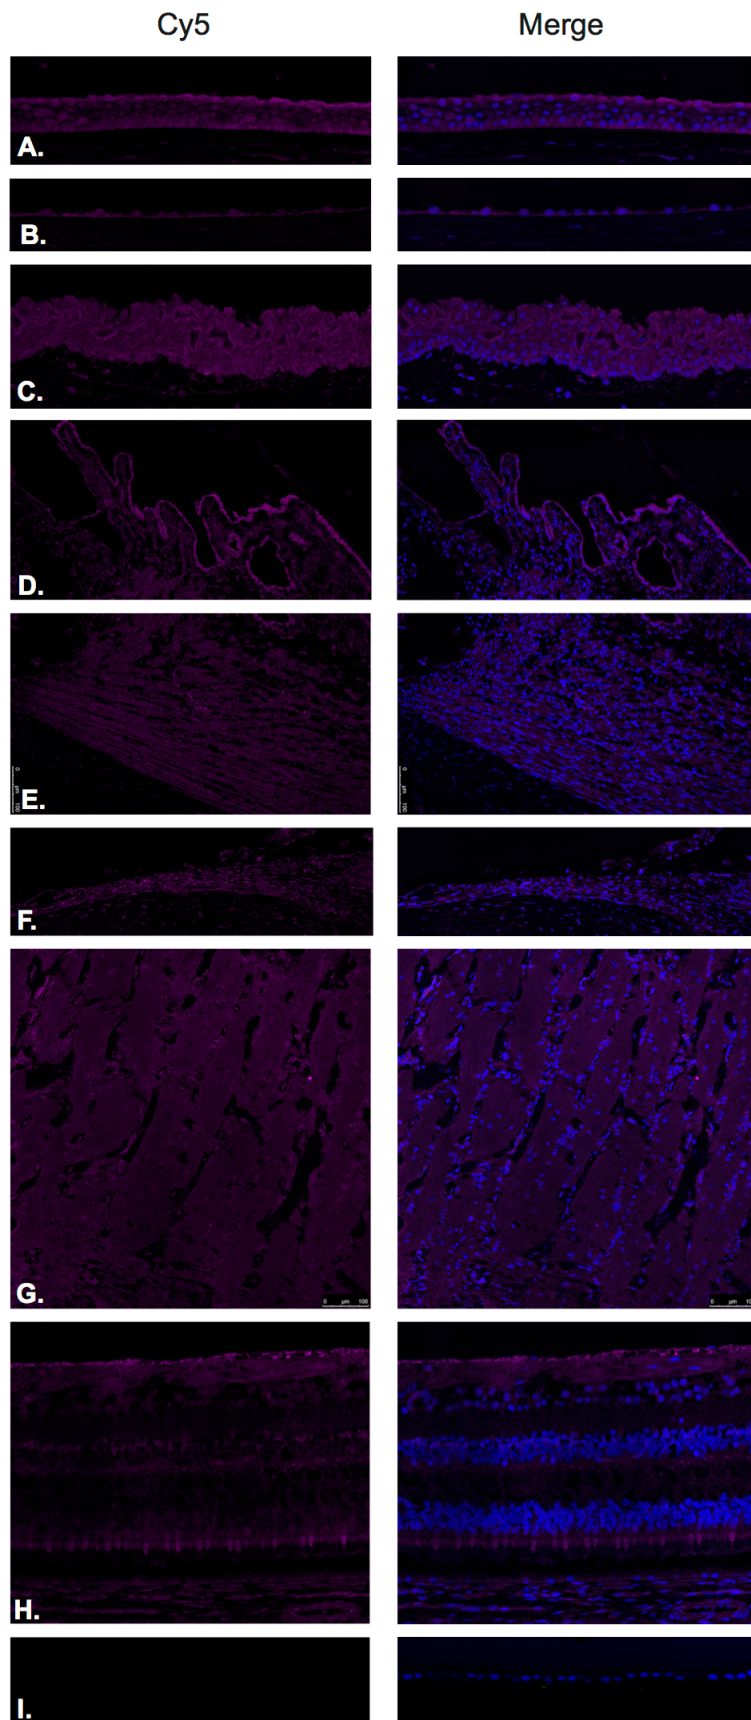

**Figure 8 : Somatostatin receptor 1(SST-R1).**



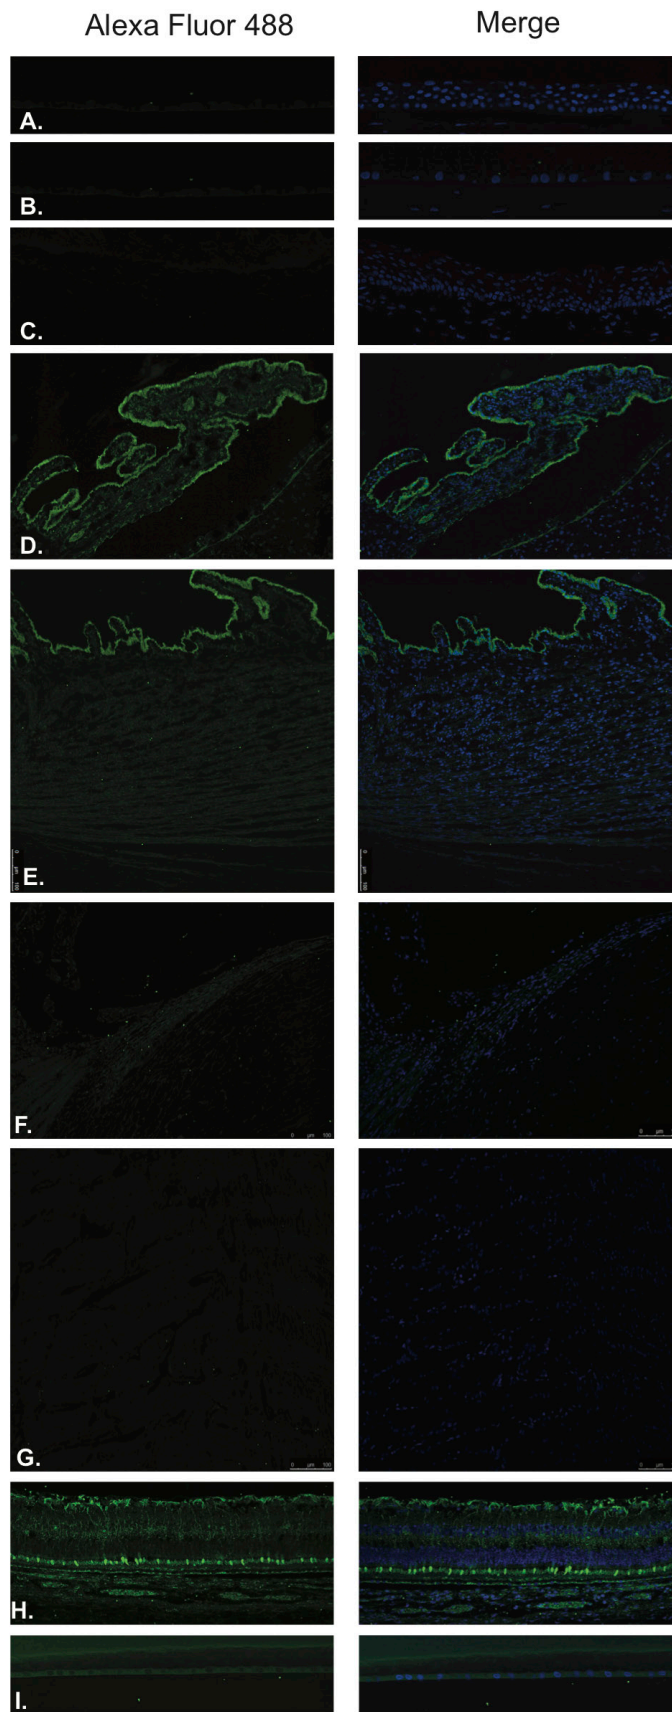

Figure 9 :Gastrin releasing peptide (GRP).

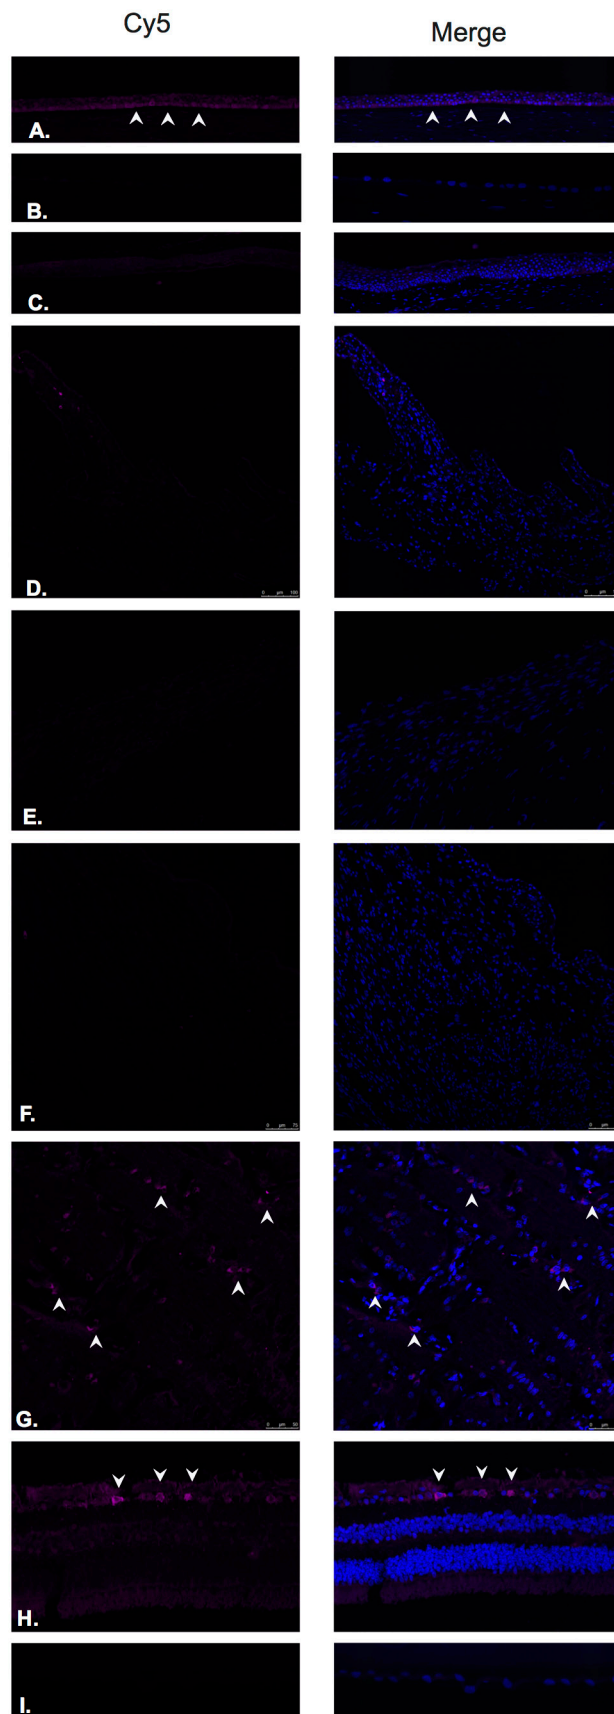

**Figure 10 : Gastrin releasing peptide receptor (GRP-R).**

Previous studies have described the presence and possible effects of TRH and somatostatin in the eye, specifically in the retina, using mouse and other mammalian models including rabbits, cats, and primates. Few studies have demonstrated the presence of these neuropeptides in the human retina using techniques other than immunofluorescence. To our knowledge, this is the first time that immunofluorescence studies have been used to demonstrate the presence of LHRH, GHRH, TRH, somatostatin, GRP and their receptors, using formalin fixed paraffin embedded tissue, in the human eye. Minor differences were found between the results obtained from RT-PCR, Western blot and Immunofluorescence for the expression of LHRH, GHRH, Somatostatin, GRP and their receptors. No clear band or positive signal was identified using the Western blot technique for TRH receptor. However, RT-PCR and immunofluorescence demonstrated its presence in the neural retina and optic nerve.

These techniques may help to evaluate and characterize the presence of these peptides and their role in other ophthalmic diseases such as Ocular Surface Squamous Neoplasia (OSSN), intraocular tumors and diabetic retinopathy, among others. These neuropeptides may play a significant role in multiple ocular physiologic mechanisms, including regulatory roles in ocular surface homeostasis, secretion or absorption of aqueous humor, and function of retinal fiber layer, ganglion cell layer, photoreceptor and optic nerve, amongst others. The use of synthetic neuropeptide analogs that have been

developed to treat a number of diseases [40-41] may now be extended, with appropriate preliminary clinical evaluation, to patients with ophthalmic diseases, given that we have shown that hypothalamic target receptors exist throughout the eye. Previous studies have demonstrated that the localization, distribution and expression pattern of these receptors and their subtypes may differ depending on the pathology present and the targeted tissue [46, 47], however, these have generally been disease specific. Our findings support the merit of further verification, elucidation, and mapping of the distribution of these neuropeptides and their respective receptors to further delineate the role that analogs of these hormonal peptides may play in models of various eye diseases.

## MATERIALS AND METHODS

This study was approved by the Institutional Review Board (IRB) at the University of Miami, Miller School of Medicine.

### Immunofluorescence staining protocol

Two formalin-fixed paraffin embedded eyes, from patients without any clinical history of intraocular disease and having no histological evidence of intraocular pathology, were selected from the Florida Lions Ocular Pathology Laboratory archives. Four-micron sections

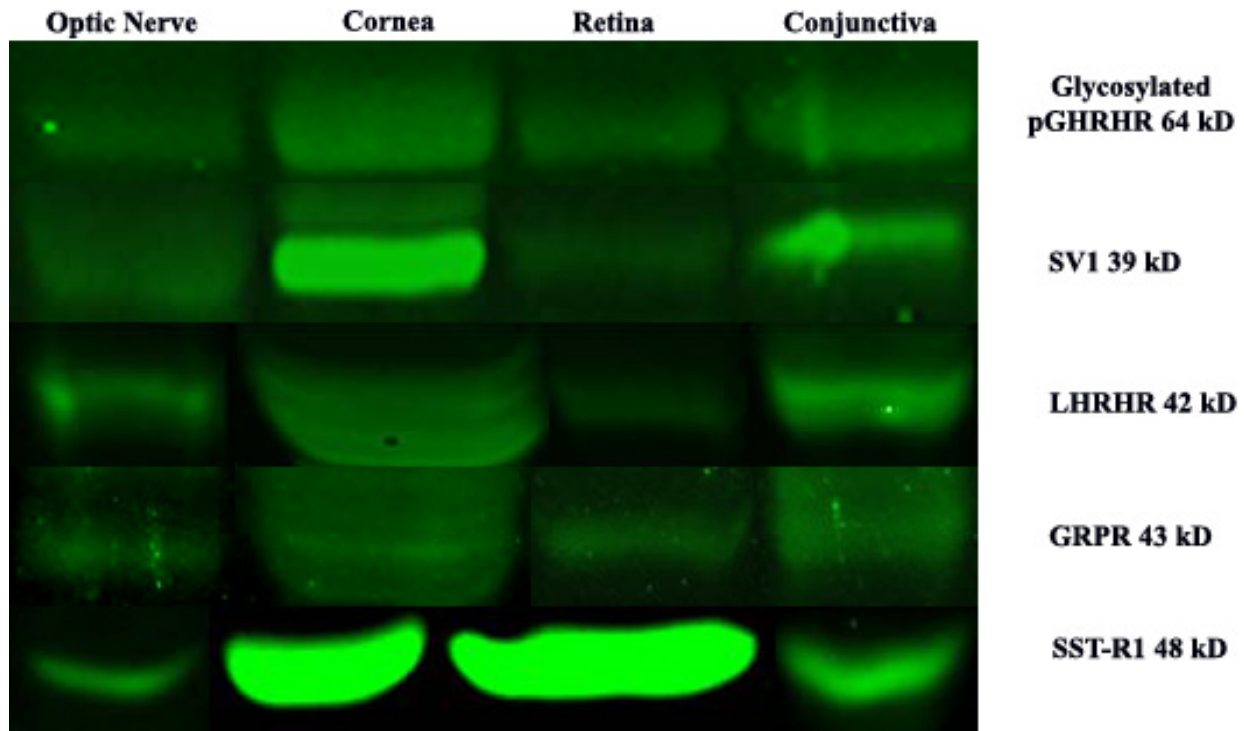

Figure 11: Western blot analysis of neuroendocrine receptor expression in optic nerve, cornea, retina and conjunctiva.

were cut from the paraffin embedded blocks. Slides were de-paraffinized and rehydrated with xylene and graded series of ethanol. Antigen retrieval was performed with Trilogy antigen retrieval solution (Cell Marque, Rocklin, California) and subsequently washed in 0.5% Triton and PBS. Blocking was performed with Background Terminator (Biocare Medical, Concord, California). The following primary polyclonal antibodies (Abcam) were used: Anti-LHRH antibody (ab5617) Anti-LHRH Receptor antibody (ab183079), Anti-GHRH antibody (ab8899), Anti-GHRH Receptor antibody (ab76263), Anti-TRH antibody (ab174714), Anti-TRH Receptor antibody (ab151510), Anti-somatostatin antibody (ab183855), Anti-somatostatin Receptor-1 antibody (ab2366), Anti-GRP antibody (ab202123) and Anti-GRP Receptor antibody (ab188821). Primary antibody was diluted in 0.5% Triton and PBS and left overnight at 4°C. After washing, the sections were incubated with the secondary antibody for 120 minutes. Alexa Fluor 488 (ab150077) was used with Anti-LHRH antibody, Anti-GHRH antibody, Anti-TRH antibody, Anti-GRP antibody and Anti-somatostatin antibody. Cy5 (ab97077) was used with Anti-LHRH Receptor antibody, Anti-GHRH Receptor antibody, Anti-TRH Receptor antibody, Anti-GRP Receptor antibody and Anti-somatostatin Receptor-1 antibody. Slides were then rinsed in PBS, mounted in Vectashield (Vector Laboratories) and sealed with clear nail varnish. Stained slides were stored at 4°C. Sections were visualized with a Leica confocal scanning microscope. Negative control assays were performed by omission of the primary antibodies. Null staining of these negative control sections confirmed the specificity of the staining (Data not shown).

### Western blot analysis

Cadaveric human eyes were obtained from the Florida Lions Eye Bank within 48 hours of death. Only deceased subjects without documented history of ophthalmic diseases or ophthalmic surgery were considered. Eyes were dissected and conjunctival tissue, corneal epithelium, retinal tissue, and optic nerve substance were isolated and snap frozen in dry ice.

For Western blot (WB) analysis, equal amounts of protein were loaded for all samples. Actin was run as an internal control for all samples. The following antibodies were utilized for WB assays: LHRH-R (Abcam ab-58561), GHRH-R/SV1 (Abcam ab28692), GRP-R (Santa Cruz sc-26836), SST-R1 (Santa Cruz sc-25675), and Actin (Sigma A5441).

### SYBR green-based RT-PCR primer design

Gene expression was determined using qRT-PCR. All RNA targets were analyzed using custom designed oligonucleotide primers designed for use in SYBR green

( ThermoFisher Scientific, Waltham, MA )based qRT-PCR. The assays were designed using extremely strict parameters in order to exclude non-human templates and target regions of low energy secondary structures, thus maximizing both specificity and sensitivity. All assays were determined to produce a single product, which was verified as the human target of interest by DNA sequencing.

Transcript specific primers were designed using the Beacon Designer software suite (PREMIER Biosoft, Palo Alto, California) with modified parameters. Primer searches were limited to regions on mRNA sequences (Refseqs), which were not homologous to the equivalent mRNA from mice (*Mus musculus*). The resulting human-specific sequences were screened for regions of stable secondary structures ( $\Delta G < -3.0$  Kcal/mol), which were excluded from our primer search. Primer searches were optimized for reverse transcription at 52°C and fast cycling PCR with single step annealing/extension at 57°C. Primer hairpin energy was limited to  $\Delta G = -3.0$  Kcal/mol; dimer energies were limited to  $\Delta G = -4.0$  Kcal/mol. Dimers including the last 3 bases of the 3' end of the primer were limited to  $\Delta G = -2.0$  Kcal/mol. Primers were designed to result in amplicons of 75-200 bp in length. Primer pairs that were less than 98% efficient were excluded. All primers used produce a single product of predictable and reproducible melting temperature ( $T_m$ ). All primers were optimized and verified by sequencing the corresponding amplicons.

### Real-time quantitative reverse-transcription polymerase chain reaction (qRT PCR)

Gene expression analysis was conducted using one-step qRT-PCR with SYBR green chemistry. This method conducts the reverse transcription reaction and PCR in a single tube format from 20ng total RNA template. The production of the PCR amplified gene product is monitored using the fluorescence resulting from the binding of SYBR green to the double stranded DNA amplicons. Reactions were conducted in a CFX96 Real-Time System using the One-Step SYBR Green qRT-PCR reaction kit (Bio-Rad, Hercules, California). Reactions were conducted in triplicate and normalized to three internal standard genes using the  $\delta\delta C_t$  method.

### Abbreviations

LHRH: Luteinizing Hormone Releasing Hormone; LHRH-R: Luteinizing Hormone Releasing Hormone Receptor; GHRH: Growth Hormone Releasing Hormone; GHRH-R: Growth Hormone Releasing Hormone Receptor; TRH: Thyrotropin Releasing Hormone; TRH-R: Thyrotropin Releasing Hormone Receptor; GRP: Gastrin Releasing Peptide; GRP-R: Gastrin Releasing Peptide



Receptor; SST: Somatostatin; SST-R1: Somatostatin Receptor-1.

### Author contributions

S.R.D., N.L.B., M.N. and A.V.S. conceptualized research. J.J.E., I.V., N.U., M.P.F. and R.P. designed research. S.R.D., J.J.E., N.U., R.P., I.V., M.P.F. and M.N. performed research. S.R.D., N.L.B., and A.V.S. contributed new reagents/analytic tools. S.R.D., J.J.E., N.B., I.V., M.N., M.P.F. and A.V.S. analyzed data and S.R.D., J.J.E., N.L.B., M.N., M.P.F. and A.V.S. wrote the paper

### ACKNOWLEDGMENTS

This work was made possible with the support of the Florida Lions Eye Bank, the NIH Center Core Grant P30EY014801, and a Research to Prevent Blindness Unrestricted Grant to S.D

The study was also supported by the Medical Research Service of the Veterans Affairs Department (A.V.S.), Sylvester Comprehensive Cancer Center of the Miller School of Medicine, University of Miami (A.V.S., N.L.B.); and the L. Austin Weeks Endowment for Research (N.L.B.).

### CONFLICTS OF INTEREST

Dr. Norman Block states that he is a Founder of Biscayne Pharmaceuticals Inc.. The authors have nothing else to disclose

### FUNDING

This research was supported by the Florida Lions Eye Bank. The Bascom Palmer Eye Institute is supported by NIH Center Core Grant P30EY014801, Research to Prevent Blindness Unrestricted Grant. The funding organizations had no role in the design or conduct of this research. the Medical Research Service of the Veterans Affairs Department , Sylvester Comprehensive Cancer Center of the Miller School of Medicine, University of Miami and the L. Austin Weeks Endowment for Research.

### REFERENCES

1. Harris G (1955). Neural control of the pituitary gland. London: Edward Arnold.
2. Anderson MS, Bowers CY, Kastin AJ, Schally AV, Snyder PJ, Utiger RD, Wilber JF, Wise AJ. Synthetic thyrotropin-releasing hormone. A potent stimulator of thyrotropin secretion in man. *N Engl J Med.* 1971; 285:1279-83.
3. Boler J, Enzmann F, Folkers K. The identity of chemical and hormonal properties of the thyrotropin releasing hormone and pyroglutamyl-histidyl-proline amide. *Biochem Biophys Res Commun.* 1969; 37: 705-10.
4. Schally AV, Arimura A, Baba Y, Nair RM, Matsuo H, Redding TW, Debeljuk L. Isolation and properties of the FSH and LH-releasing hormone. *Biochem Biophys Res Commun.* 1971;43: 393-9.
5. Schally AV, Arimura A, Kastin AJ, Matsuo H, Baba Y, Redding TW, Nair RM, Debeljuk L, White WF. Gonadotropin-releasing hormone: one polypeptide regulates secretion of luteinizing and follicle-stimulating hormones. *Science.* 1971; 173:1036-8.
6. Schally AV. Aspects of hypothalamic regulation of the pituitary gland. *Science.* 1978; 202: 18-28.
7. Brazeau P, Vale W, Burgus R, Ling N, Butcher M, Rivier J, Guillemin R. Hypothalamic polypeptide that inhibits the secretion of immunoreactive pituitary growth hormone. *Science.* 1973;179:77-79.
8. Schally AV, Dupont A, Arimura A, Redding TW, Nishi N, Linthicum GL, Schlesinger DH. Isolation and structure of somatostatin from porcine hypothalamus. *Biochemistry.* 1976;15:509-14.
9. Schally AV, Kastin AJ, Arimura A. Hypothalamic follicle-stimulating hormone (FSH) and luteinizing hormone (LH)-regulating hormone: structure, physiology, and clinical studies. *Fertil Steril.* 1971; 22 : 703-21.
10. Thorner MO. The discovery of growth hormone-releasing hormone. *J Clin Endocrinol Metab.* 1999;84:4671-4676.
11. Guillemin R, Brazeau P, Böhlen P, Esch F, Ling N, Wahrenberg WB. Growth hormone-releasing factor from a human pancreatic tumor that caused acromegaly. *Science.* 1982; 218:585-587.
12. Rivier J, Spiess J, Thorner M, Vale W. Characterization of a growth hormone-releasing factor from a human pancreatic islet tumour. *Nature.* 1982; 300:276-278.
13. Schally AV, Comaru-Schally AM, Nagy A, Kovacs M, Szepeshazi K, Plonowski A, Varga JL, Halmos G. Hypothalamic hormones and cancer. *Front Neuroendocrinol.* 2001; 22: 248-91.
14. Reubi JC, Schaer JC, Markwalder R, Waser B, Horisberger U, Laissue J. Distribution of somatostatin receptors in normal and neoplastic human tissues: recent advances and potential relevance. *Yale J Biol Med.* 1997;70:471-479.
15. Rekasi Z, Czompoly T, Schally AV, Halmos G. Isolation and sequencing of cDNAs for splice variants of growth hormone-releasing hormone receptors from human cancers. *Proc Natl Acad Sci USA.* 2000; 97: 10561-6.
16. Kulaksiz H, Eissele R, Rössler D, Schulz S, Höllt V, Cetin Y, Arnold R. Identification of somatostatin receptor subtypes 1, 2A, 3, and 5 in neuroendocrine tumours with subtype specific antibodies. *Gut.* 2002; 50:52-60.
17. Schally AV. Luteinizing hormone-releasing hormone analogs: their impact on the control of tumorigenesis. *Peptides.* 1999; 20: 1247-62.

18. Schally AV, Varga JL, Engel JB. Antagonists of growth-hormone-releasing hormone: an emerging new therapy for cancer. *Nat Clin Pract Endocrinol Metab.* 2008; 4: 33-43.
19. Schally AV, Block NL, Nadji M, Szepeshazi K, Zarandi M, Vidaurre I, Perez R, Halmos G, Szalontay L. Antagonists of growth hormone-releasing hormone (GHRH) reduce prostate size in experimental benign prostatic hyperplasia. *Proc Natl Acad Sci USA.* 2011; 108: 3755-60.
20. Redding TW, Schally AV. Inhibition of prostate tumor growth in two rat models by chronic administration of D-Trp6 analogue of luteinizing hormone-releasing hormone. *Proc Natl Acad Sci USA.* 1981;78:6509-12.
21. Tolis G, Ackman D, Stellos A, Mehta A, Labrie F, Fazekas AT, Comaru-Schally AM, Schally AV. Tumor growth inhibition in patients with prostatic carcinoma treated with luteinizing hormone-releasing hormone agonists. *Proc Natl Acad Sci USA.* 1982;79: 1658-62.
22. Engel JB, Schally AV, Buchholz S, Seitz S, Emons G, Ortmann O. Targeted chemotherapy of endometrial, ovarian and breast cancers with cytotoxic analogs of luteinizing hormone-releasing hormone (LHRH). *Arch Gynecol Obstet.* 2012; 286: 437-42.
23. Seitz S, Rick FG, Schally AV, Treszl A, Hohla F, Szalontay L, Zarandi M, Ortmann O, Engel JB, Buchholz S. Combination of GHRH antagonists and docetaxel shows experimental effectiveness for the treatment of triple-negative breast cancers. *Oncol Rep.* 2013;30:413-8.
24. Perez R, Schally AV, Vidaurre I, Rincon R, Block NL, Rick FG. Antagonists of growth hormone-releasing hormone suppress in vivo tumor growth and gene expression in triple negative breast cancers. *Oncotarget.* 2012;3: 988-997. <https://doi.org/10.18632/oncotarget.634>.
25. Schally AV, Comaru-Schally AM. Hypothalamic and other peptide hormones. *Holland-Frei Cancer Medicine.* 6th edition 2006. Hamilton (ON): BC Decker. Chapter 61.
26. Rick FG, Seitz S, Schally AV, Szalontay L, Krishan A, Datz C, Stadlmayr A, Buchholz S, Block NL, Hohla F. GHRH antagonist when combined with cytotoxic agents induces S-phase arrest and additive growth inhibition of human colon cancer. *Cell Cycle.* 2012;11: 4203-10.
27. Szepeshazi K, Schally AV, Treszl A, Seitz S, Halmos G. Therapy of experimental hepatic cancers with cytotoxic peptide analogs targeted to receptors for luteinizing hormone-releasing hormone, somatostatin or bombesin. *Anticancer Drugs.* 2008, 19: 349-58.
28. Szepeshazi K, Schally AV, Keller G, Block NL, Benten D, Halmos G, Szalontay L, Vidaurre I, Jaszberenyi M, Rick FG. Receptor-targeted therapy of human experimental urinary bladder cancers with cytotoxic LH-RH analog AN-152 [AEZS- 108]. *Oncotarget.* 2012; 3: 686-99. <https://doi.org/10.18632/oncotarget.546>
29. Kiaris H, Schally AV, Nagy A, Szepeshazi K, Halmos G. A targeted cytotoxic somatostatin(SST) analogue AN-238 inhibits the growth of H-69 small cell lung carcinoma (SCLC) and H-157 non SCLC in nude mice. *Eur J Cancer.* 2001;37: 620-628.
30. Cai R, Schally AV, Cui T. Synthesis of new potent agonistic analogs of growth hormone-releasing hormone (GHRH) and evaluation of their endocrine and cardiac activities. *Peptides.* 2014; 52: 104-12.
31. Kanashiro-Takeuchi RM, Takeuchi LM, Rick FG, Dulce R, Treuer AV, Florea V, Rodrigues CO, Paulino EC, Hatzistergos KE, Selem SM, Gonzalez DR, Block NL, Schally AV, Hare JM. Activation of growth hormone releasing hormone (GHRH) receptor stimulates cardiac reverse remodeling after myocardial infarction (MI). *Proc Natl Acad Sci USA.* 2012;109: 559-63.
32. Kanashiro-Takeuchi RM, Tziomalos K, Takeuchi LM, Treuer AV, Lamirault G, Dulce R, Hurtado M, Song Y, Block NL, Rick F, Klukovits A, Hu Q, Varga JL, et al. Cardioprotective effects of growth hormone-releasing hormone agonist after myocardial infarction. *Proc Natl Acad Sci USA.* 2010; 107: 2604-9.
33. Sunday ME, Kaplan LM, Motoyama E, Chin WW, Spindel ER. Gastrin-releasing peptide (mammalian bombesin) gene expression in health and disease. *Lab Invest.* 1988;59: 5-24.
34. Mitsuma T, Hirooka Y, Kayama M, Mori Y, Adacht K, Takagi J, Wago T, Ping J, Nogimori T. Thyrotropin-releasing hormone and somatostatin inhibit each others release in vitro in the rat retina. *Exp Clin Endocrinol Diabetes.* 1998;106: 140-2.
35. Naseem SM. Thyrotropin-releasing hormone effects on phosphatidylinositol metabolism and binding in rat pituitary and retina. *Biochem Int.* 1989;18: 203-10.
36. Burt DR, Taylor RL. TRH receptor binding in retina and pituitary: major species variation. *Exp Eye Res.* 1982; 35: 173-82.
37. Schaeffer JM, Brownstein MJ, Axelrod J. Thyrotropin-releasing hormone-like material in the rat retina: changes due to environmental lighting. *Proc Natl Acad Sci USA.* 1977;74: 3579-81.
38. Dal Monte M, Ristori C, Videau C, Loudes C, Martini D, Casini G, Epelbaum J, Bagnoli P. Expression, localization, and functional coupling of the somatostatin receptor subtype 2 in a mouse model of oxygen-induced retinopathy. *Invest Ophthalmol Vis Sci.* 2010; 51: 1848-56.
39. Johnson J, Rickman DW, Brecha NC. Somatostatin and Somatostatin Subtype 2A Expression in the Mammalian Retina. *Microsc Res Tech.* 2000; 50: 103-11.
40. Klisovic DD, O'Dorisio MS, Katz SE, Sall JW, Balster D, O'Dorisio TM, Craig E, Lubow M. Somatostatin receptor gene expression in human ocular tissues: RT-PCR and immunohistochemical study. *Invest Ophthalmol Vis Sci.* 2001; 42:2193-2201.
41. Tornqvist K, Ehinger B. Peptide immunoreactive neurons in the human retina. *Invest Ophthalmol Vis Sci.* 1988; 29:680-686.
42. Jen PY, Li WW, Yew DT. Immunohistochemical

- localization of neuropeptide y and somatostatin in human fetal retina. *Neuroscience*. 1994; 60:727-735.
43. Papadaki T, Tsilimbaris M, Pallikaris I, Thermos K. Somatostatin Receptor Activation (sst(1) -sst(5) ) Differentially Influences Human Retinal Pigment Epithelium Cell Viability. *Acta Ophthalmol*. 2010; 88: e228-33.
  44. Martino E, Nardi M, Vaudagna G, Simonetti S, Cilotti A, Pinchera A, Venturi G, Seo H, Baschieri L. Thyrotropin-Releasing Hormone-like Material in Human Retina. *J Endocrinol Invest*. 1980;3: 267.
  45. Gabriel R. Neuropeptides and diabetic retinopathy. *Br J Clin Pharmacol*. 2013;75: 1189-201.
  46. Lambooy AC, Kuijpers RW, van Lichtenauer-Kaligis EG, Kliffen M, Baarsma GS, van Hagen PM, Mooy CM. Somatostatin receptor 2A expression in choroidal neovascularization secondary to age-related macular degeneration. *Invest Ophthalmol Vis Sci*. 2000;41:2329-2335.
  47. Qin YJ, Chan SO, Chong KK, Li BF, Ng TK, Yip YW, Chen H, Zhang M, Block NL, Cheung HS, Schally AV, Pang CP. Antagonist of GH-releasing hormone receptors alleviates experimental ocular inflammation. *Proc Natl Acad Sci USA*. 2014;111: 18303-8.
  48. Liu JH, Dacus AC, Bartels SP. Thyrotropin releasing hormone increases intraocular pressure. Mechanism of action. *Invest Ophthalmol Vis Sci*. 1989; 30: 2200-8.
